# Supplementary material for: Non-linear machine learning models incorporating SNPs and PRS improve polygenic prediction in diverse human populations
Source: PubMed Central journal article supplement (PMC9395509; doi:10.1038/s42003-022-03812-z), 2022-08-22
Supplement: 42003_2022_3812_MOESM3_ESM.pdf [file 42003_2022_3812_MOESM3_ESM.pdf]

## Description of Additional Supplementary Files

**File name:** Supplementary Data 1

**Description:** The source data behind the figures in the paper.
